# Supplementary material for: Highly active sustainable ferrocenated iron oxide nanocatalysts for the decolorization of methylene blue
Source: Royal Society of Chemistry journal article supplement (doi:10.1039/c5ra03885e), 2015-01-01
Supplement: c5ra03885e1.pdf [file c5ra03885e1.pdf]

Electronic Supporting Information

for

Highly Active Sustainable Ferrocenated Iron Oxide  
Nanocatalysts for the Decolorization of Methylene Blue

Atchaleeya Jinasan,<sup>a,b</sup> Thinnaphat Poonsawat,<sup>a</sup> Laksamee Chaicharoenwimolkul,<sup>c</sup>

Soraya Pornsuwan<sup>a</sup> and Ekasith Somsook<sup>\*a</sup>

<sup>a</sup> *NANOCAST Laboratory, Center for Catalysis, Department of Chemistry and Center of Excellence for Innovation in Chemistry, Faculty of Science, Mahidol University, 272 Rama VI Rd., Ratchathewi, Bangkok 10400, Thailand. Fax: +(66)23547151; Tel: +(66)22015123; E-mail: [ekasith.som@mahidol.ac.th](mailto:ekasith.som@mahidol.ac.th)*

<sup>b</sup> *The Materials Science and Engineering Program, Faculty of Science, Mahidol University, 272 Rama VI Rd., Ratchathewi, Bangkok 10400, Thailand*

<sup>c</sup> *Chemistry, Faculty of Science and Technology, Surattthani Rajabhat University, 272 Moo 9, Surat-Nasan Rd., Khuntale, Muang, Surat Thani 84100, Thailand.*

## Experimental section

All chemicals ferric chloride hexahydrate ( $\text{FeCl}_3 \cdot 6\text{H}_2\text{O}$ ) (Merck), ferrous chloride tetrahydrate ( $\text{FeCl}_2 \cdot 4\text{H}_2\text{O}$ ) (Fluka), ferrocene (Acros), sulfuric acid (RCI Lab Scan), sodium chloride (Fisher chemical), and methylene blue (Merck) were analytical grade and used as received.

The ferrocene-trapped iron oxide nanoparticles were characterized by X-ray powder diffraction (XRD). The XRD pattern was obtained on a Bruker D8 ADVANCE diffractometer with  $\text{Cu-K}\alpha$  radiation between  $10^\circ$  to  $80^\circ$ . The morphology images of nanoparticles were obtained by transmission electron microscopy (TEM) model JEOL JEM-2100 on copper grid covered by formvar. Fourier transform infrared spectroscopy (FTIR) was performed on Perkin Series to identify the functional groups in iron oxide. The UV-visible spectrophotometer was carried out on JASCO V-530 in range of 350-700 nm and scan speed of 1000 nm/min. Thermal analysis (DSC/TGA) was performed on TA instruments SDT2960 Simultaneous using the heating rate at  $20^\circ\text{C}/\text{min}$  from room temperature to  $800^\circ\text{C}$  under nitrogen gas. Electrospray ionization (ESI) was carried out on microTOF, and positive ion mode. Electron paramagnetic resonance spectroscopy (EPR) was carried out on JEOL JES-RE2X operated at X-band microwave (8.8-9.6 GHz), magnetic field range of 3.1 T, cylindrical cavity resonator ( $\text{TE}_{011}$  mode), and program ES-PRIT. Vibrating sample magnetometer (VSM) was performed on electromagnet in model HV-4H, Hall probe-based gaussmeter on model Lakeshore 455, and field range up to  $\pm 9$  kOe. X-ray photoelectron spectroscopy (XPS) was performed on Kratos Axis Ultra. Brunauer-Emmett-Teller (BET) was measured surface area, pore size and volume using a Quantachrome Autosorb Automated Gas Sorption System in nitrogen adsorption. The zeta potential technique was carried out with Zetasizer Nano-ZS

model ZEN 3600. Elemental analyses were performed on a Perkin-Elmer series II CHNS/O Analyzer 2400.

**General Synthesis of ferrocenated iron oxide nanoparticles** The synthesis was carried out using the coprecipitation of iron sources and ferrocenium ion at different ratio including different bases. The following procedure is for **A1** or **A3**. Other ratios can be adjusted accordingly. Concentrated sulfuric acid ( $0.3 \text{ cm}^3$ ) was added to ferrocene (6.84 g, 36.75 mmol) and stirred for 2 minutes giving a blue viscous solution. Water ( $5 \text{ cm}^3$ ) was then added and stirred for 30 min. A solution of ferrous chloride tetrahydrate (1.55 g, 12.25 mmol) and ferric chloride hexahydrate (4.15 g, 25.6 mmol) in  $80 \text{ cm}^3$  de-ionized water was then added into the ferrocenium solution and stirred for 1 hour. A saturated NaOH or  $4.83 \text{ mol/dm}^3$   $\text{NH}_4\text{OH}$  solution was slowly added dropwise to adjust pH to 12 giving an orange precipitate. The mixture was then stirred for 2 hours. The orange precipitate was collected by centrifugation at 4500 rpm for 20 minutes. The product was purified by alternate washing with de-ionized water, collected by centrifugation for 6 times, and checked sulfate salt with dropwise de-ionized water after washing in  $\text{BaCl}_2$  solution. The orange solid was then incubated at  $80^\circ\text{C}$  for 24 hours giving 8.69 g product. The product may be further calcined at  $500^\circ\text{C}$  for 5 hours to give **A2** catalyst.

**Decolorization of methylene blue** The desired catalyst (0.100 g) was added into a solution of methylene blue ( $9.97 \times 10^{-6} \text{ mol/dm}^3$ ,  $100 \text{ cm}^3$ ). The reaction flask was wrapped with aluminium foil and kept in the dark box while stirring. At desired time,  $3 \text{ cm}^3$  of the solution mixture was collected for analysis. The catalyst was separated from the mixture by centrifugation at 4500 rpm for 3 minutes. The clear supernatant was analyzed by UV-visible spectrophotometer and ESI-MS.

**The reusability of catalyst** The resulting catalyst separated by centrifugation at 4500 rpm for 3 minutes was then added a solution of methylene blue ( $9.97 \times 10^{-6}$  mol/dm<sup>3</sup>, 100 cm<sup>3</sup>) for the second run. The process was repeated as needed. For the reactivation with 0.1 mol/dm<sup>3</sup> sodium chloride and de-ionized water, the reaction was carried out similarly except that before the addition of methylene blue for each subsequent run, the catalyst was added a solution of the reactivator (100 cm<sup>3</sup>), stirred for 10 minutes, and separated by centrifugation at 4500 rpm for 3 minutes.

**EPR spin trapping** Stock solution of spin trap in solvent as phosphate buffer was prepared by ferrocenated oxide nanocatalyst (3.04 mg) was dissolved in 5,5-dimethyl-1-pyrroline N-oxide (DMPO) ( $7.64 \times 10^{-6}$  mol/dm<sup>3</sup>), phosphate buffer pH 7.4 (50 mmol/dm<sup>3</sup>, 2 cm<sup>3</sup>), and incubate for 20 minutes. All EPR spectrums were average of 1000 scans and simulated the spectra with WinSim 2002 program.

**Table S1.** Zeta potential values of iron oxide nanocatalysts.

| <b>Sample Code</b> | <b>Zeta Potential (mV)</b> |
|--------------------|----------------------------|
| <b>A1</b>          | - 8.83                     |
| <b>A2</b>          | - 6.08                     |
| <b>A3</b>          | - 9.49                     |
| <b>A4</b>          | - 7.00                     |
| <b>B1</b>          | - 8.73                     |
| <b>B2</b>          | - 7.14                     |
| <b>B3</b>          | - 10.06                    |
| <b>B4</b>          | - 7.55                     |
| <b>C1</b>          | - 8.96                     |
| <b>C2</b>          | - 6.70                     |
| <b>C3</b>          | - 9.65                     |
| <b>C4</b>          | - 6.94                     |

**Table S2.** The binding energy of (a) Fe 2*p*, (b) O 1*s*, and (c) C 1*s* of ferrocenated iron oxide nanoparticles.

| Sample Code               | Binding Energy (eV) | Characteristic                             |
|---------------------------|---------------------|--------------------------------------------|
| <b>A1</b> – Fe 2 <i>p</i> | 707.9               | Ferrocene (Fe <sup>2+</sup> )              |
|                           | 710.3               | Fe <sup>3+</sup> 2 <i>p</i> <sub>3/2</sub> |
|                           | 711.7               | Fe <sup>3+</sup> 2 <i>p</i> <sub>3/2</sub> |
|                           | 713.4               | Fe <sup>3+</sup> 2 <i>p</i> <sub>3/2</sub> |
|                           | 723.5               | Fe <sup>3+</sup> 2 <i>p</i> <sub>1/2</sub> |
|                           | 725.1               | Fe <sup>3+</sup> 2 <i>p</i> <sub>1/2</sub> |
|                           | 726.9               | Fe <sup>3+</sup> 2 <i>p</i> <sub>1/2</sub> |
|                           | 728.7               | Fe <sup>3+</sup> 2 <i>p</i> <sub>1/2</sub> |
| <b>A2</b> – Fe 2 <i>p</i> | 709.7               | Fe <sup>2+</sup> 2 <i>p</i> <sub>3/2</sub> |
|                           | 711.1               | Fe <sup>3+</sup> 2 <i>p</i> <sub>3/2</sub> |
|                           | 713.1               | Fe <sup>3+</sup> 2 <i>p</i> <sub>3/2</sub> |
|                           | 723.0               | Fe <sup>3+</sup> 2 <i>p</i> <sub>1/2</sub> |
|                           | 724.6               | Fe <sup>3+</sup> 2 <i>p</i> <sub>1/2</sub> |
|                           | 726.5               | Fe <sup>3+</sup> 2 <i>p</i> <sub>1/2</sub> |
| <b>A3</b> – Fe 2 <i>p</i> | 708.0               | Ferrocene (Fe <sup>2+</sup> )              |
|                           | 710.5               | Fe <sup>3+</sup> 2 <i>p</i> <sub>3/2</sub> |
|                           | 711.8               | Fe <sup>3+</sup> 2 <i>p</i> <sub>3/2</sub> |
|                           | 713.3               | Fe <sup>3+</sup> 2 <i>p</i> <sub>3/2</sub> |
|                           | 722.6               | Fe <sup>3+</sup> 2 <i>p</i> <sub>1/2</sub> |
|                           | 724.1               | Fe <sup>3+</sup> 2 <i>p</i> <sub>1/2</sub> |
|                           | 725.4               | Fe <sup>3+</sup> 2 <i>p</i> <sub>1/2</sub> |
|                           | 726.9               | Fe <sup>3+</sup> 2 <i>p</i> <sub>1/2</sub> |

| Sample Code               | Binding Energy (eV) | Characteristic                             |
|---------------------------|---------------------|--------------------------------------------|
| <b>B1</b> – Fe 2 <i>p</i> | 708.0               | Ferrocene (Fe <sup>2+</sup> )              |
|                           | 710.6               | Fe <sup>3+</sup> 2 <i>p</i> <sub>3/2</sub> |
|                           | 711.9               | Fe <sup>3+</sup> 2 <i>p</i> <sub>3/2</sub> |
|                           | 713.6               | Fe <sup>3+</sup> 2 <i>p</i> <sub>3/2</sub> |
|                           | 722.8               | Fe <sup>3+</sup> 2 <i>p</i> <sub>1/2</sub> |
|                           | 724.7               | Fe <sup>3+</sup> 2 <i>p</i> <sub>1/2</sub> |
|                           | 726.2               | Fe <sup>3+</sup> 2 <i>p</i> <sub>1/2</sub> |
|                           | 727.4               | Fe <sup>3+</sup> 2 <i>p</i> <sub>1/2</sub> |
| <b>B3</b> – Fe 2 <i>p</i> | 707.9               | Ferrocene (Fe <sup>2+</sup> )              |
|                           | 710.5               | Fe <sup>3+</sup> 2 <i>p</i> <sub>3/2</sub> |
|                           | 711.8               | Fe <sup>3+</sup> 2 <i>p</i> <sub>3/2</sub> |
|                           | 713.2               | Fe <sup>3+</sup> 2 <i>p</i> <sub>3/2</sub> |
|                           | 722.8               | Fe <sup>3+</sup> 2 <i>p</i> <sub>1/2</sub> |
|                           | 724.1               | Fe <sup>3+</sup> 2 <i>p</i> <sub>1/2</sub> |
|                           | 725.7               | Fe <sup>3+</sup> 2 <i>p</i> <sub>1/2</sub> |
|                           | 727.4               | Fe <sup>3+</sup> 2 <i>p</i> <sub>1/2</sub> |
| <b>C1</b> – Fe 2 <i>p</i> | 709.2               | Fe <sup>2+</sup> 2 <i>p</i> <sub>3/2</sub> |
|                           | 711.0               | Fe <sup>3+</sup> 2 <i>p</i> <sub>3/2</sub> |
|                           | 713.0               | Fe <sup>3+</sup> 2 <i>p</i> <sub>3/2</sub> |
|                           | 722.5               | Fe <sup>3+</sup> 2 <i>p</i> <sub>1/2</sub> |
|                           | 724.5               | Fe <sup>3+</sup> 2 <i>p</i> <sub>1/2</sub> |
|                           | 726.6               | Fe <sup>3+</sup> 2 <i>p</i> <sub>1/2</sub> |
| <b>C3</b> – Fe 2 <i>p</i> | 709.8               | Fe <sup>2+</sup> 2 <i>p</i> <sub>3/2</sub> |
|                           | 711.5               | Fe <sup>3+</sup> 2 <i>p</i> <sub>3/2</sub> |
|                           | 713.0               | Fe <sup>3+</sup> 2 <i>p</i> <sub>3/2</sub> |
|                           | 723.7               | Fe <sup>3+</sup> 2 <i>p</i> <sub>1/2</sub> |
|                           | 725.1               | Fe <sup>3+</sup> 2 <i>p</i> <sub>1/2</sub> |
|                           | 726.6               | Fe <sup>3+</sup> 2 <i>p</i> <sub>1/2</sub> |

| Sample Code             | Binding Energy (eV) | Characteristic |
|-------------------------|---------------------|----------------|
| <b>A1</b> – O <i>1s</i> | 530.0               | Fe-O           |
|                         | 531.6               | C-O            |
|                         | 532.8               | O-H            |
| <b>A2</b> – O <i>1s</i> | 530.0               | Fe-O           |
|                         | 531.6               | C-O            |
|                         | 532.7               | O-H            |
| <b>A3</b> – O <i>1s</i> | 530.1               | Fe-O           |
|                         | 531.9               | C-O            |
|                         | 532.9               | O-H            |
| <b>B1</b> – O <i>1s</i> | 530.2               | Fe-O           |
|                         | 531.5               | C-O            |
|                         | 532.4               | O-H            |
| <b>B3</b> – O <i>1s</i> | 530.2               | Fe-O           |
|                         | 531.5               | C-O            |
|                         | 532.3               | O-H            |
| <b>C1</b> – O <i>1s</i> | 529.6               | Fe-O           |
|                         | 531.7               | C-O            |
|                         | 533.1               | O-H            |
| <b>C3</b> – O <i>1s</i> | 530.1               | Fe-O           |
|                         | 531.5               | C-O            |
|                         | 532.4               | O-H            |

| Sample Code             | Binding Energy (eV) | Characteristic |
|-------------------------|---------------------|----------------|
| <b>A1</b> – C <i>1s</i> | 285.0               | C-C            |
|                         | 286.5               | C-O            |
|                         | 288.4               | O-C-C          |
| <b>A2</b> – C <i>1s</i> | 285.0               | C-C            |
|                         | 286.6               | C-O            |
|                         | 288.8               | O-C-C          |
| <b>A3</b> – C <i>1s</i> | 284.9               | C-C            |
|                         | 286.0               | C-O            |
|                         | 288.6               | O-C-C          |
| <b>B1</b> – C <i>1s</i> | 284.9               | C-C            |
|                         | 286.4               | C-O            |
|                         | 288.4               | O-C-C          |
| <b>B3</b> – C <i>1s</i> | 284.9               | C-C            |
|                         | 286.1               | C-O            |
|                         | 288.6               | O-C-C          |
| <b>C1</b> – C <i>1s</i> | 285.0               | C-C            |
|                         | 286.6               | C-O            |
|                         | 288.9               | O-C-C          |
| <b>C3</b> – C <i>1s</i> | 285.0               | C-C            |
|                         | 286.2               | C-O            |
|                         | 288.8               | O-C-C          |

**Table S3.**The percentage of weight loss at 400 °C and 700°C of prepared samples.

| <b>Sample Code</b> | <b>Weight loss at 400 °C (%)</b> | <b>Weight loss at 700 °C (%)</b> |
|--------------------|----------------------------------|----------------------------------|
| <b>A1</b>          | 65.95                            | 69.73                            |
| <b>A2</b>          | 0.55                             | 0.69                             |
| <b>A3</b>          | 63.67                            | 67.33                            |
| <b>A4</b>          | 1.94                             | 3.05                             |
| <b>B1</b>          | 74.12                            | 76.47                            |
| <b>B2</b>          | 0.77                             | 0.94                             |
| <b>B3</b>          | 73.87                            | 74.40                            |
| <b>B4</b>          | 2.22                             | 4.15                             |
| <b>C1</b>          | 13.39                            | 13.44                            |
| <b>C2</b>          | 1.34                             | 1.81                             |
| <b>C3</b>          | 10.92                            | 10.88                            |
| <b>C4</b>          | 0.42                             | 0.46                             |

**Table S4.** BET analysis of prepared samples.

| <b>Sample Code</b> | <b>Surface Area (m<sup>2</sup>/g)</b> | <b>Pore Volume (cc/g)</b> | <b>Pore Size (nm)</b> |
|--------------------|---------------------------------------|---------------------------|-----------------------|
| <b>A1</b>          | 41.23                                 | 0.15                      | 14.07                 |
| <b>A2</b>          | 35.71                                 | 0.07                      | 8.34                  |
| <b>A3</b>          | 40.11                                 | 0.20                      | 20.41                 |
| <b>A4</b>          | 28.26                                 | 0.09                      | 13.44                 |
| <b>B1</b>          | 33.31                                 | 0.10                      | 12.13                 |
| <b>B2</b>          | 33.38                                 | 0.11                      | 13.35                 |
| <b>B3</b>          | 91.11                                 | 0.34                      | 14.81                 |
| <b>B4</b>          | 23.76                                 | 0.14                      | 23.39                 |
| <b>C1</b>          | 201.50                                | 0.30                      | 5.94                  |
| <b>C2</b>          | 27.73                                 | 0.18                      | 25.70                 |
| <b>C3</b>          | 73.71                                 | 0.31                      | 16.98                 |
| <b>C4</b>          | 31.82                                 | 0.08                      | 10.95                 |

**Table S5.** CHN analysis of prepared samples.

| <b>Sample Code</b> | <b>%C</b> | <b>%H</b> |
|--------------------|-----------|-----------|
| <b>A1</b>          | 41.36     | 3.86      |
| <b>A2</b>          | 0.18      | 0.14      |
| <b>A3</b>          | 40.45     | 3.77      |
| <b>A4</b>          | 0.12      | 0.11      |
| <b>B1</b>          | 46.79     | 3.99      |
| <b>B2</b>          | 0.22      | 0         |
| <b>B3</b>          | 47.20     | 4.12      |
| <b>B4</b>          | 0.22      | 0.11      |
| <b>C1</b>          | 0.64      | 0.92      |
| <b>C2</b>          | 0.53      | 0.07      |
| <b>C3</b>          | 0.34      | 0.91      |
| <b>C4</b>          | 0.05      | 0.02      |

**Table S6.** The simulation of superoxide and hydroxyl adducts described with the hyperfine splitting constant of nitrogen and hydrogen on EPR.

| Sample                                                                                          | DMPO adduct                                       | Hyperfine splitting constant of nitrogen (G)                                  | Hyperfine splitting constant of hydrogen (G)                                      |
|-------------------------------------------------------------------------------------------------|---------------------------------------------------|-------------------------------------------------------------------------------|-----------------------------------------------------------------------------------|
| <b>A1</b> in DMPO / phosphate buffer (1 <sup>st</sup> time)                                     | DMPO-OOH (~72%)<br>DMPOX (~20%)<br>DMPO-OH (~8%)  | 15.44 (a <sub>N</sub> )<br>14.80 (a <sub>N</sub> )<br>14.41 (a <sub>N</sub> ) | 22.85 (a <sub>H1</sub> ), 0.46 (a <sub>H2</sub> )<br>-<br>14.62 (a <sub>H</sub> ) |
| <b>A1</b> reactivated with sodium chloride in DMPO / phosphate buffer (12 <sup>th</sup> times)  | DMPO-OOH (~40%)<br>DMPOX (~46%)<br>DMPO-OH (~14%) | 15.00 (a <sub>N</sub> )<br>14.30 (a <sub>N</sub> )<br>14.43 (a <sub>N</sub> ) | 22.35 (a <sub>H1</sub> ), 0.60 (a <sub>H2</sub> )<br>-<br>14.45 (a <sub>H</sub> ) |
| <b>A1</b> reactivated with de-ionized water in DMPO / phosphate buffer (12 <sup>th</sup> times) | DMPO-OOH (~36%)<br>DMPOX (~53%)<br>DMPO-OH (~11%) | 15.28 (a <sub>N</sub> )<br>14.46 (a <sub>N</sub> )<br>14.41 (a <sub>N</sub> ) | 22.30 (a <sub>H1</sub> ), 0.56 (a <sub>H2</sub> )<br>-<br>14.40 (a <sub>H</sub> ) |

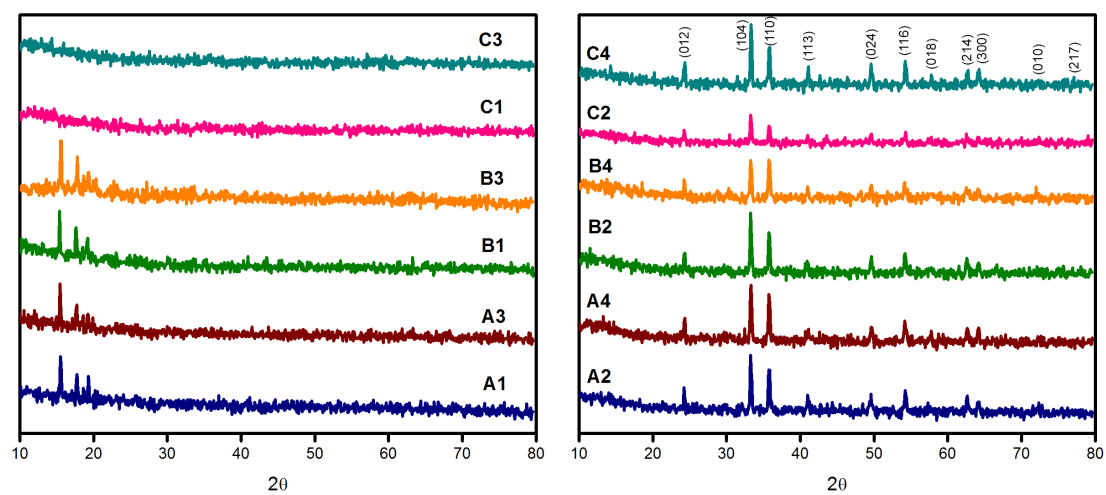

**Figure S1.** The XRD patterns of iron oxide before and after calcination.

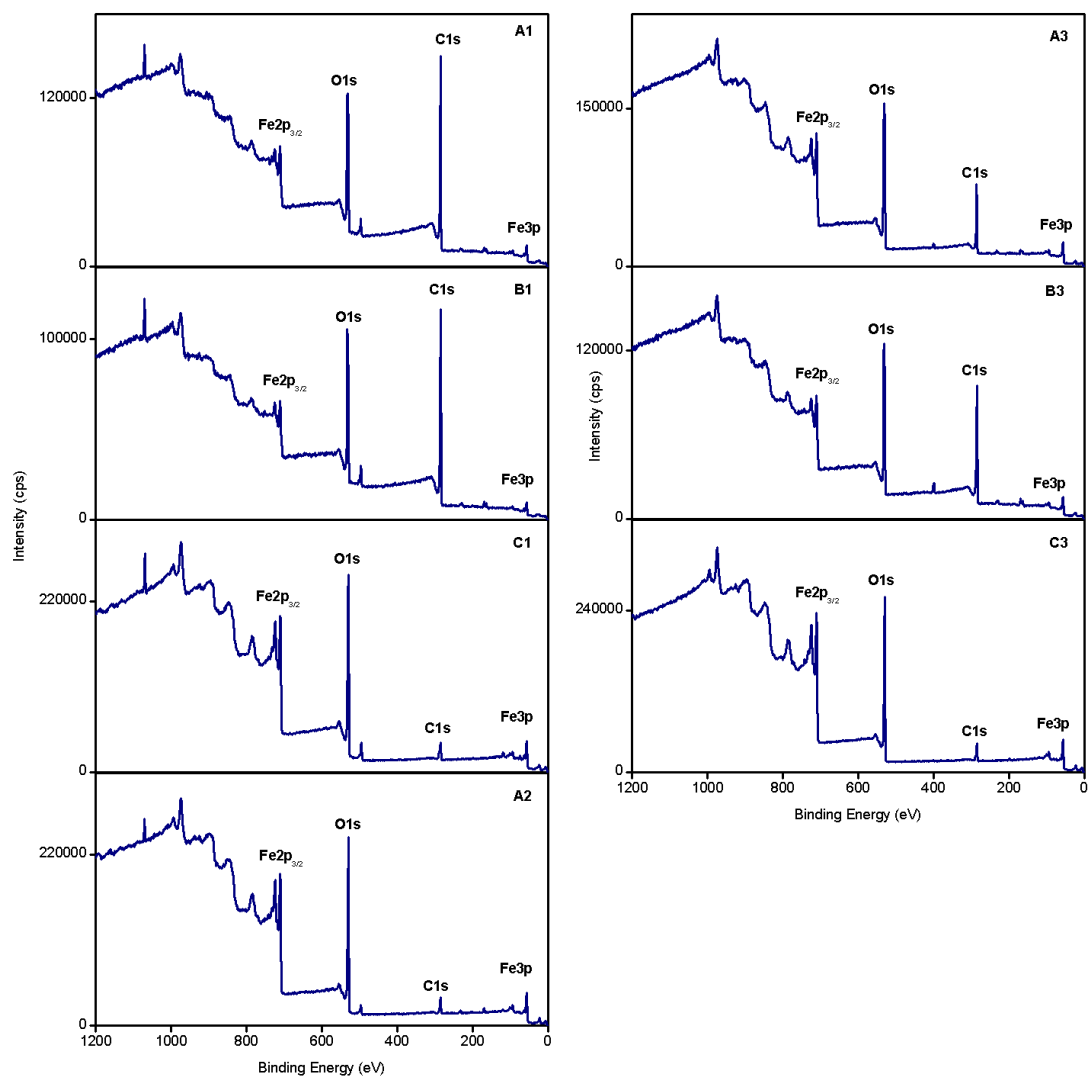

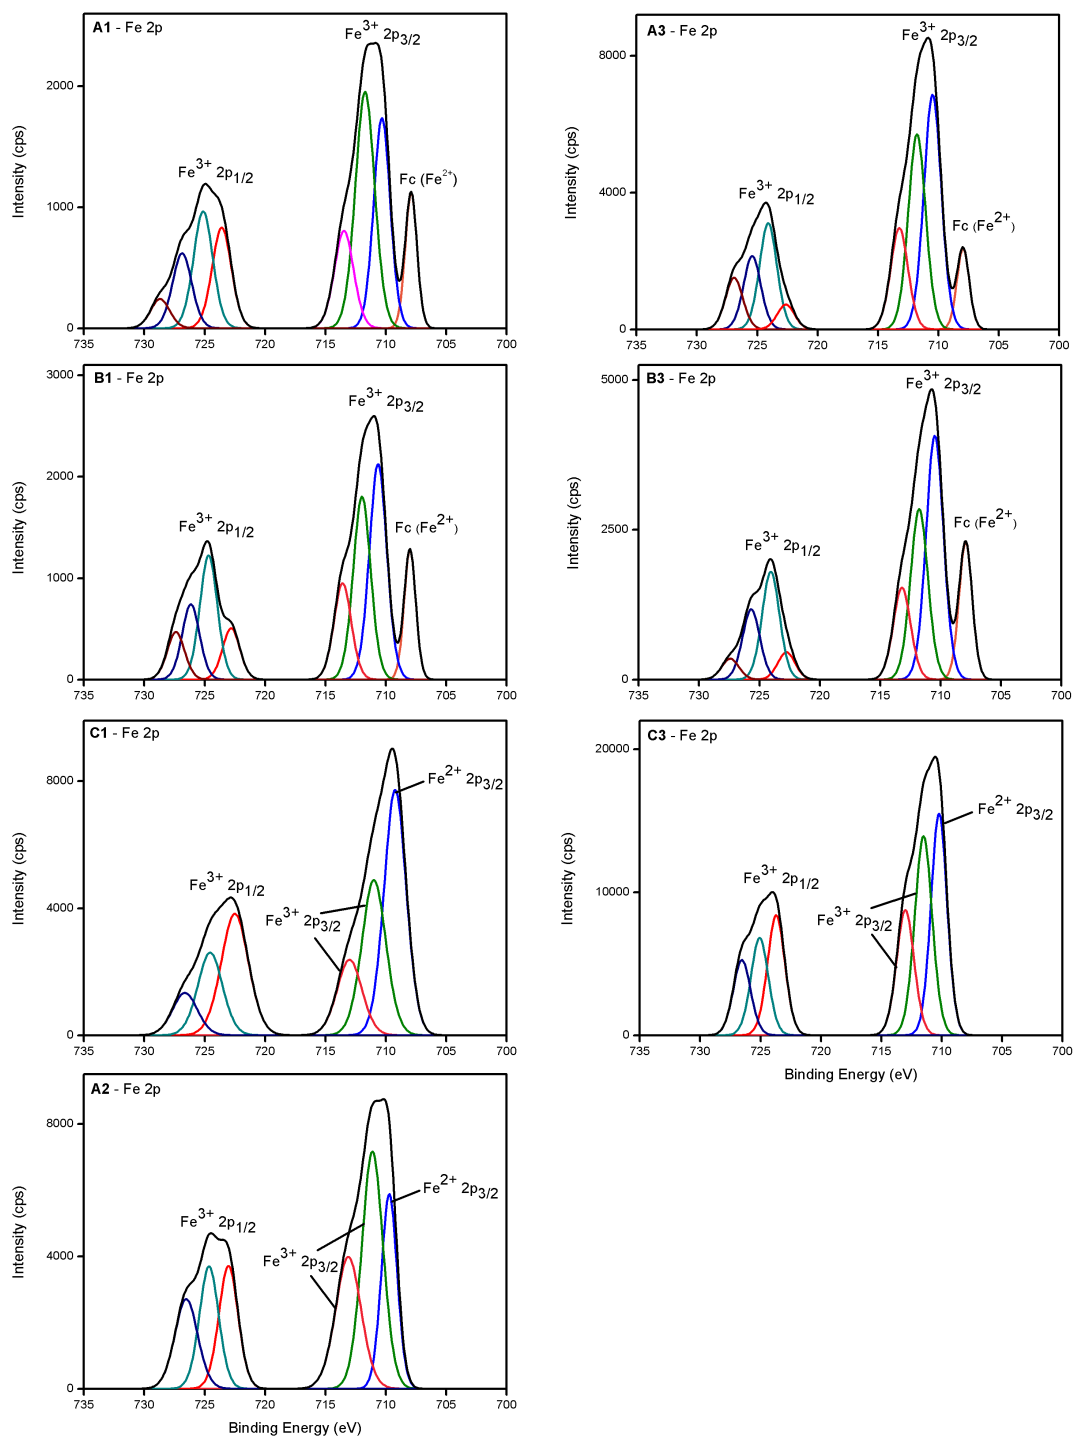

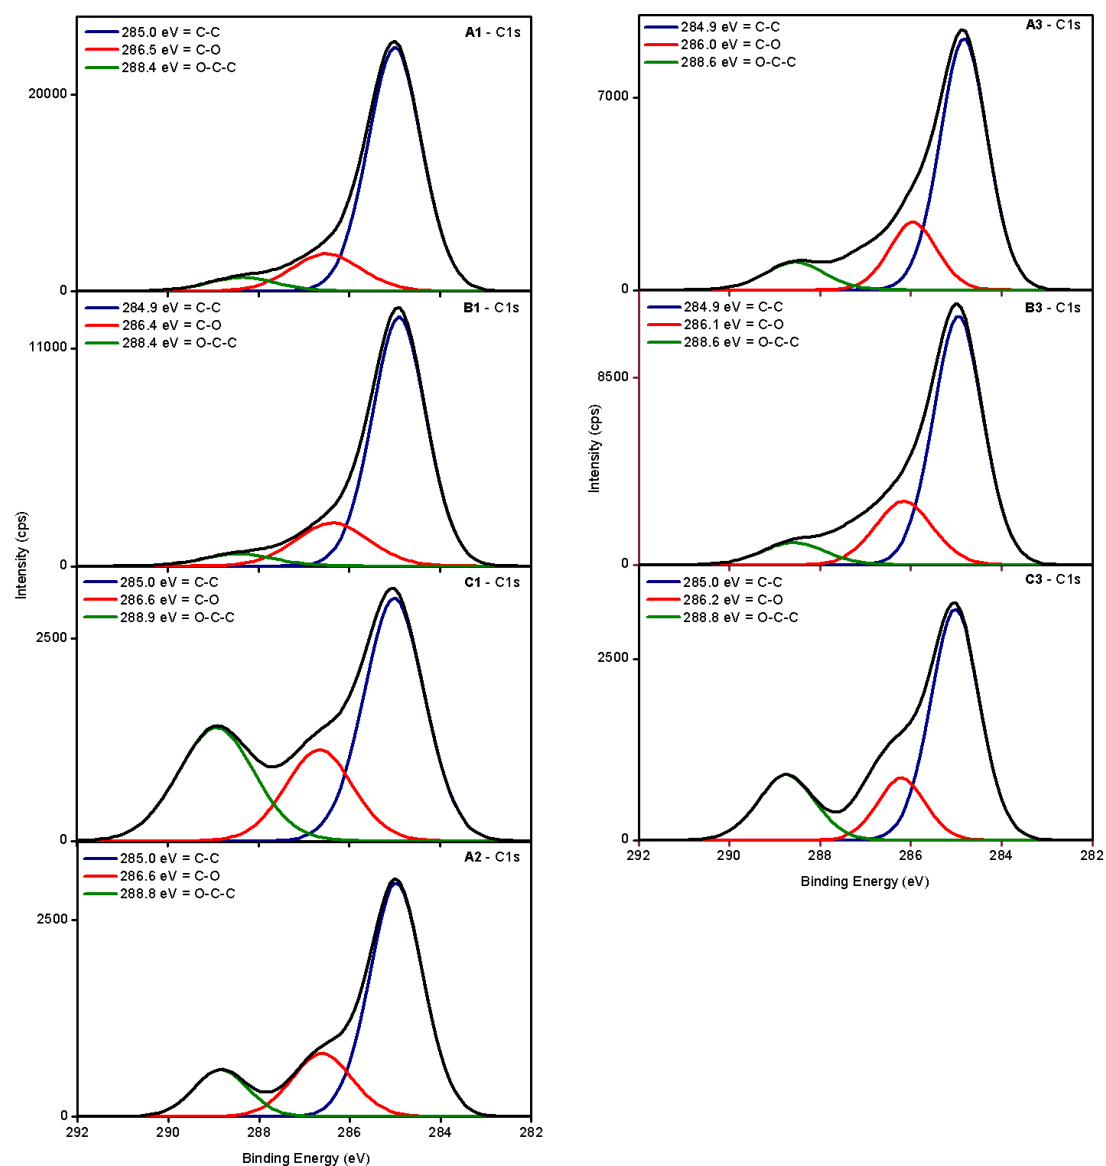

**Figure S2.** XPS spectra of prepared samples.

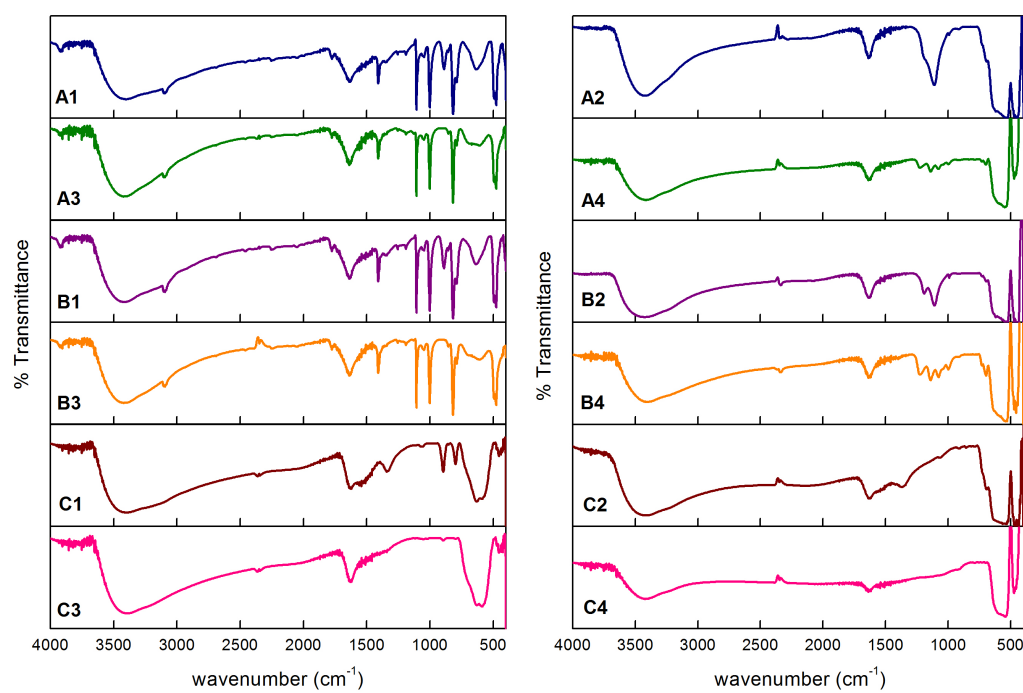

**Figure S3.** FTIR spectra of prepared samples (left) before calcination and (right) after calcination at 500 °C, 5 hours.

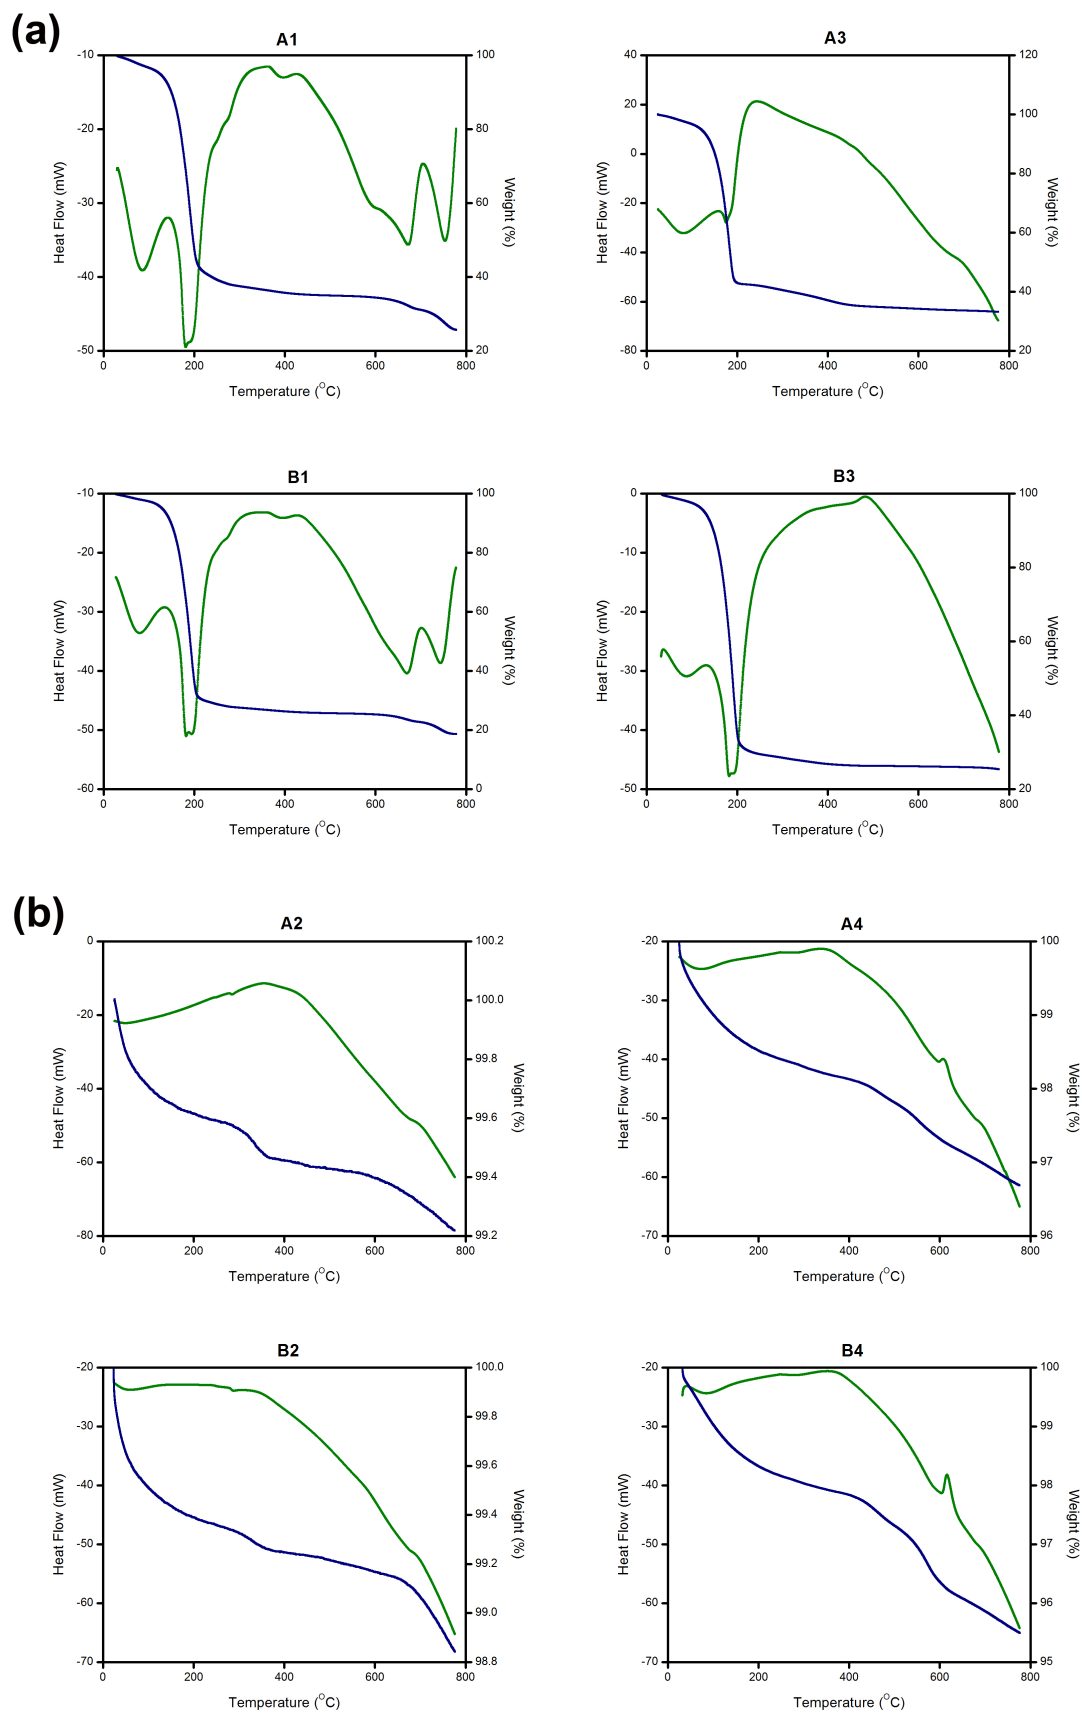

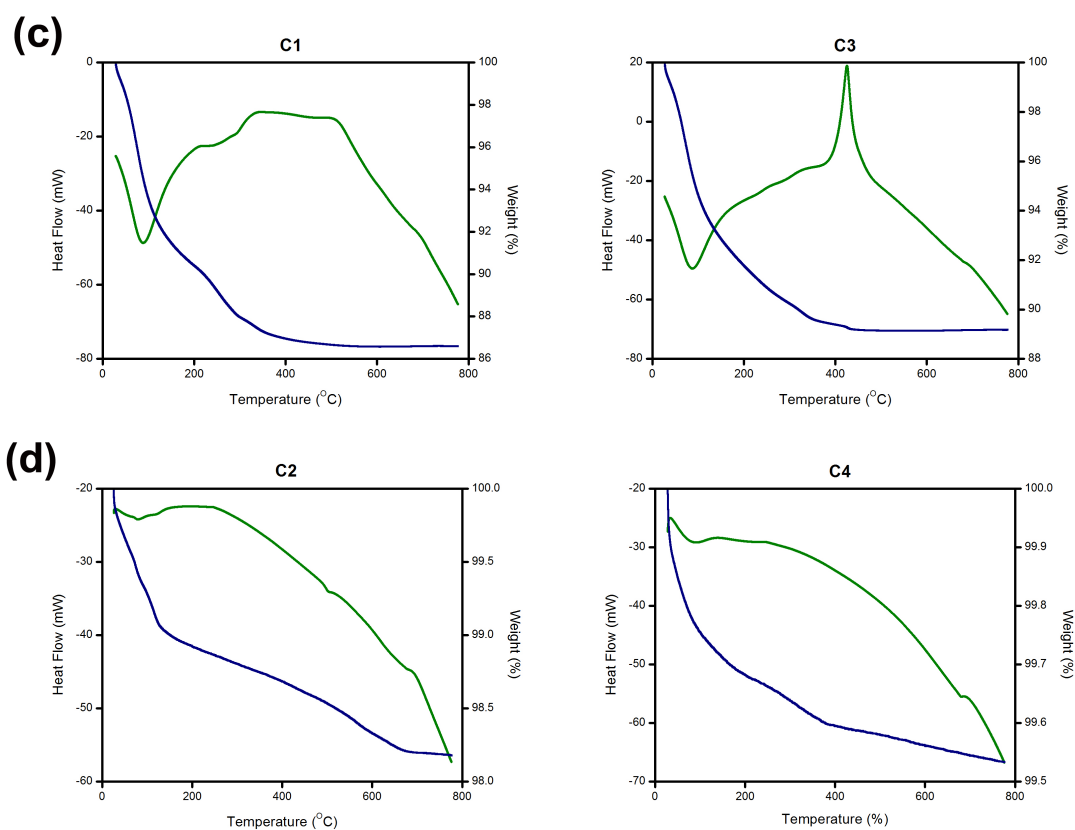

**Figure S4.** DSC/TGA of prepared samples.

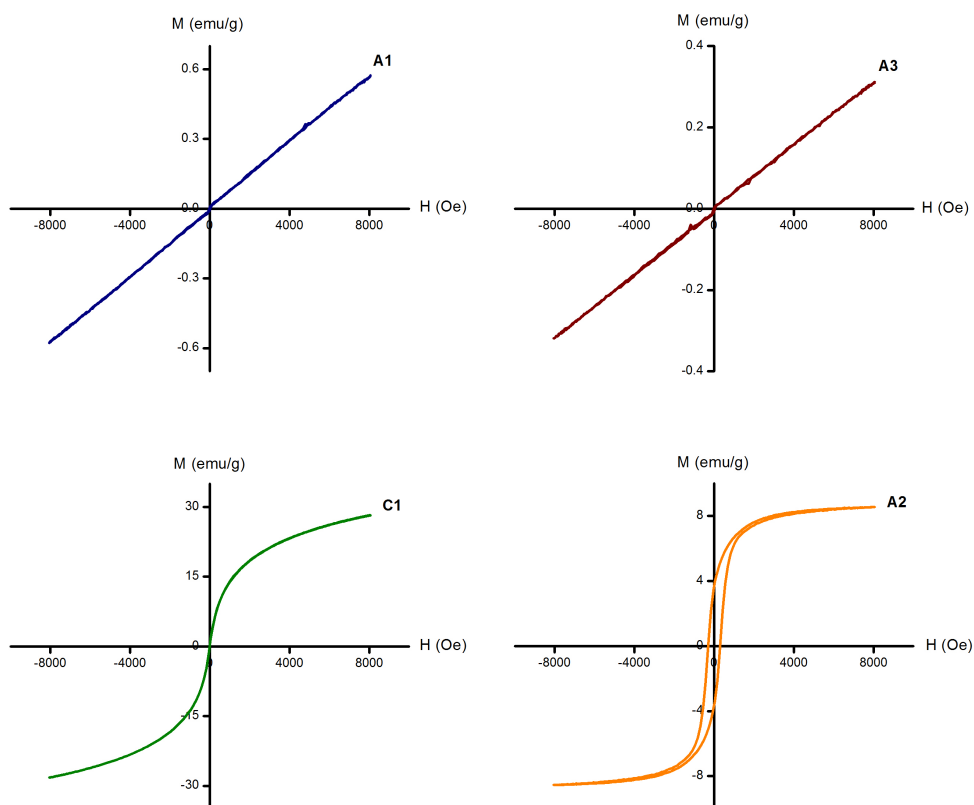

**Figure S5.** The magnetization curves of A1, A2, A3, and C1 samples.

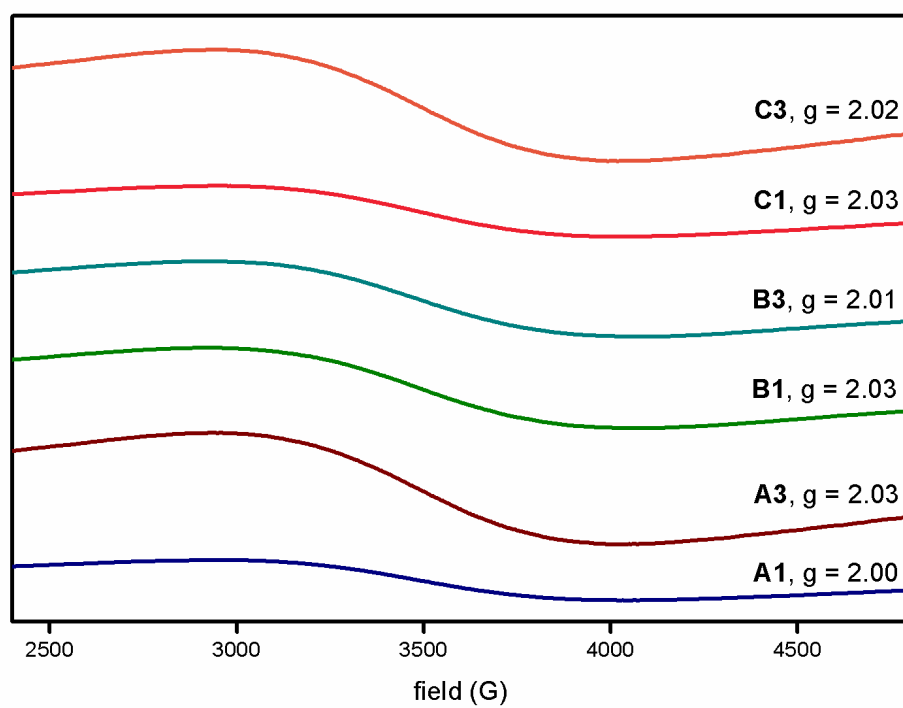

**Figure S6.** EPR spectra of prepared samples without calcination.

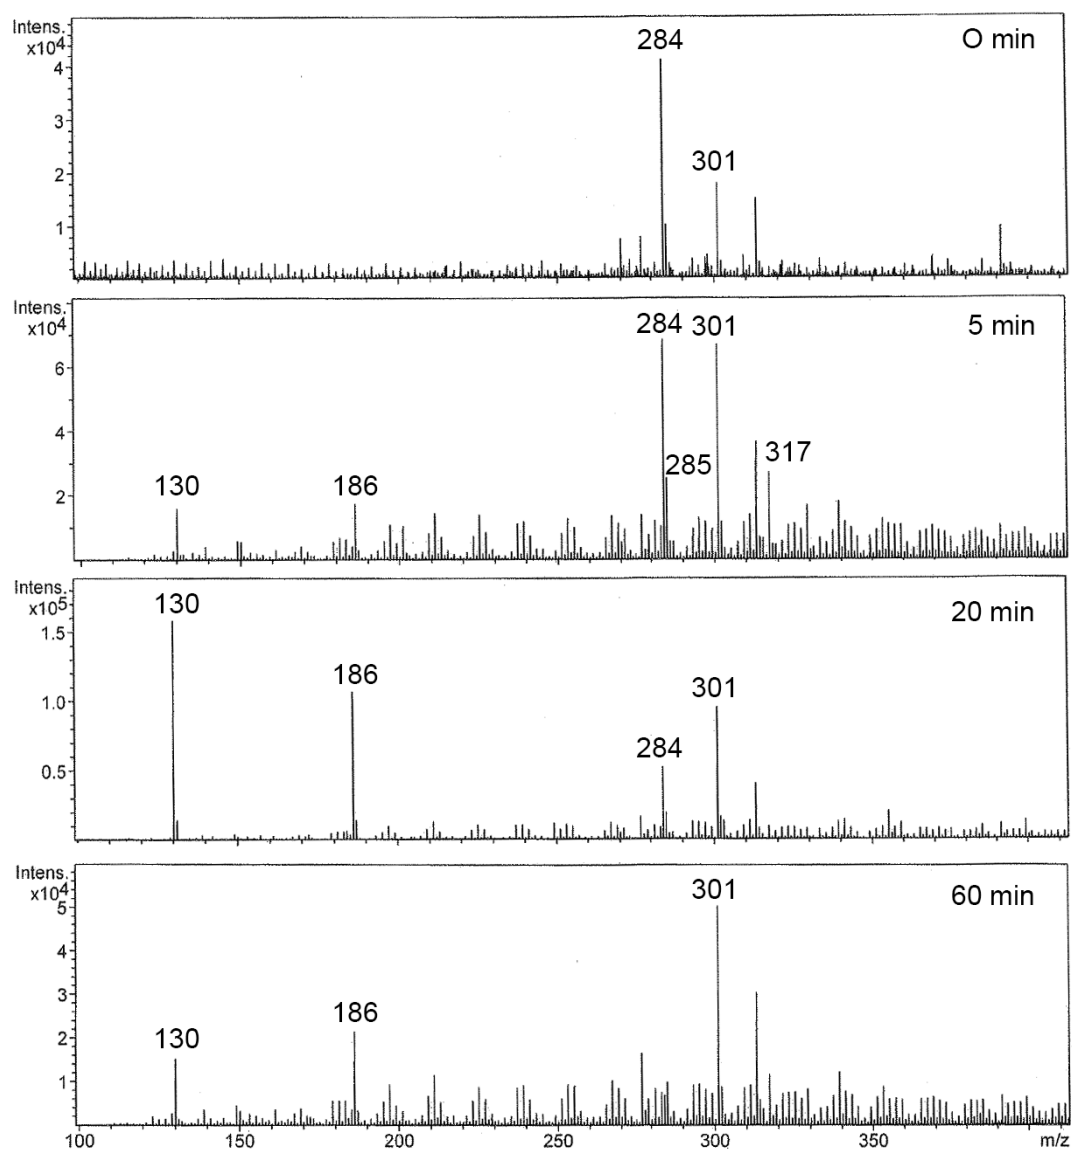

**Figure S7.** ESI-MS of decolorized methylene blue catalyzed by A1 catalyst.

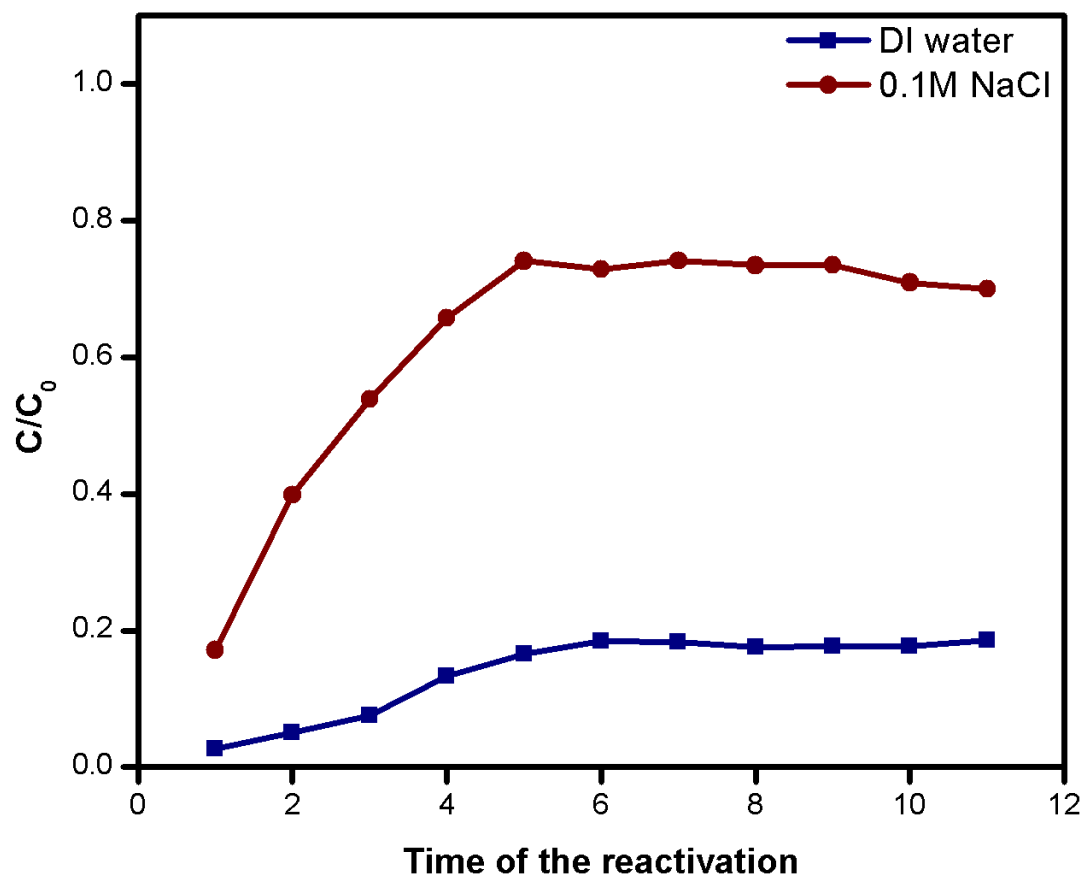

**Figure S8.** Concentration of methylene blue vs. time of the reactivation of de-ionized water and 0.1 mol/dm<sup>3</sup> sodium chloride in methylene blue solution by **A1** catalyst.

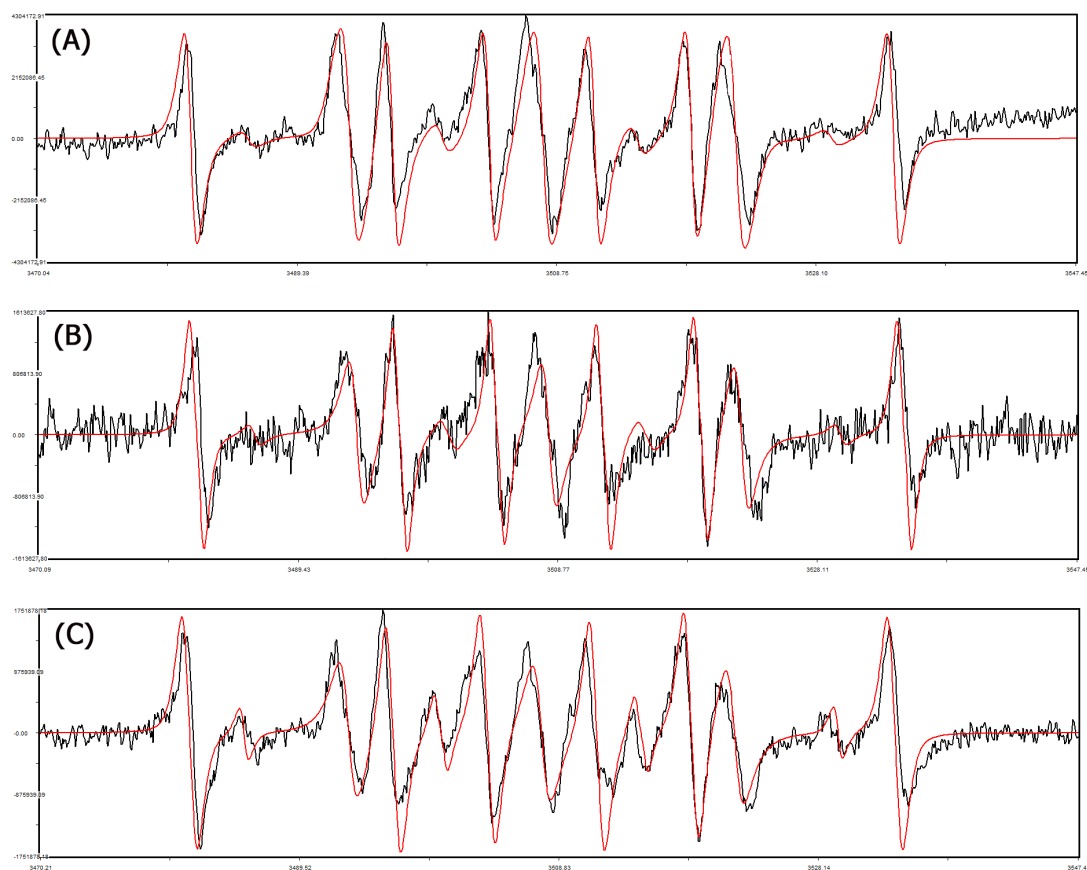

**Figure S9.** EPR spectra of **A1** in DMPO adduct and phosphate buffer after incubating for 20 minutes (A) **A1** in the 1<sup>st</sup> time (B) **A1** after reactivated with NaCl in the 12<sup>th</sup> times, and (C) **A1** after reactivated with DI water in the 12<sup>th</sup> times with experiment data in black line and red line for the simulation.

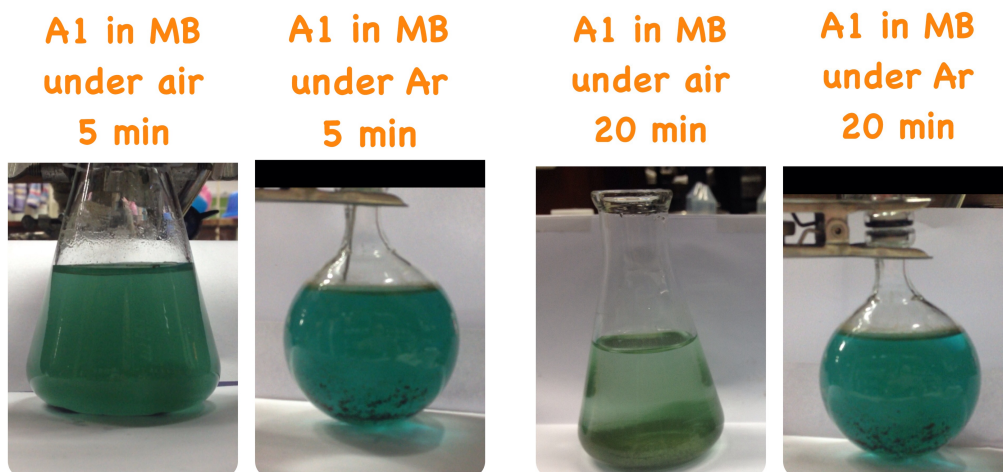

**Figure S10.** The comparison of the decolorization of methylene blue under air and Ar atmospheres.

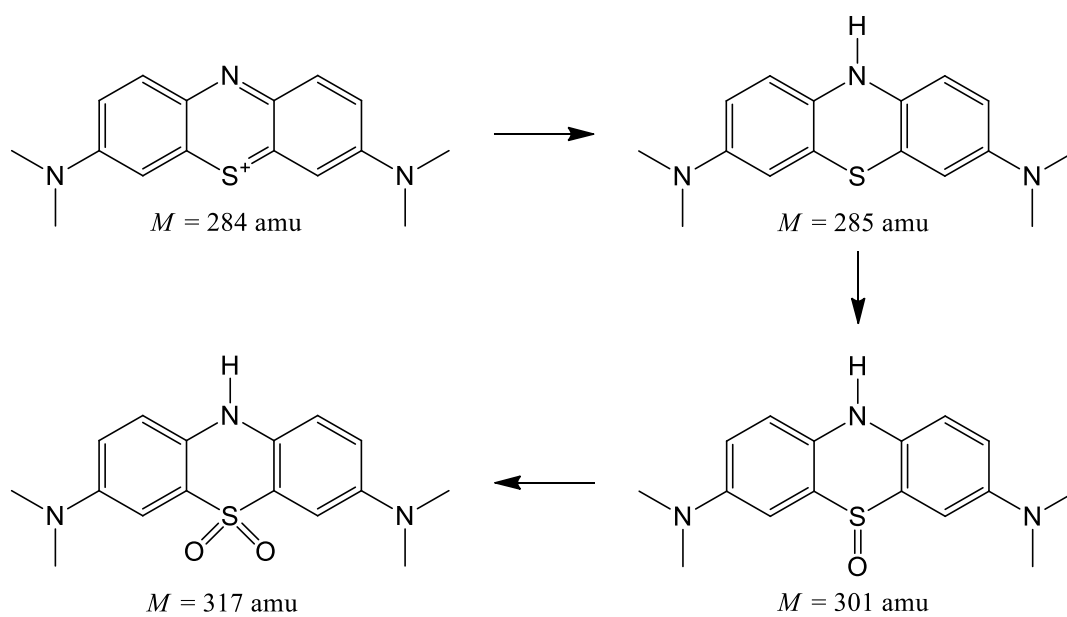

**Scheme S1.** Possible decolorization products from methylene blue.
